# Supplementary material for: Topological analysis of a haloacid permease of a Burkholderia sp. bacterium with a PhoA-LacZ reporter
Source: PubMed Central journal article supplement (PMC2777183; doi:10.1186/1471-2180-9-233), 2009-10-31
Supplement: 1471-2180-9-233-S1.pdf [file 1471-2180-9-233-S1.pdf]

Additional file 1. PhoA and LacZ enzymes activities of *E. coli* cells carrying pHKU1601 series plasmids.

| Plasmid      | Fusion <sup>a</sup> | PhoA activity rate <sup>b</sup> | LacZ activity rate <sup>c</sup> | Cell density PhoA <sup>d</sup> | Cell density LacZ <sup>e</sup> | Relative PhoA activity <sup>f</sup> | Relative LacZ activity <sup>g</sup> | Strength index <sup>h</sup> | Location <sup>i</sup> |
|--------------|---------------------|---------------------------------|---------------------------------|--------------------------------|--------------------------------|-------------------------------------|-------------------------------------|-----------------------------|-----------------------|
| pHKU1601-034 | D34                 | 0.0000                          | 0.0064                          | 0.1681                         | 0.1713                         | 0.0001 ±0.0082                      | 0.1089 ±0.0068                      | -6.993                      | C                     |
| pHKU1601-052 | G52                 | 0.0000                          | 0.0070                          | 0.1454                         | 0.1493                         | 0.0001 ±0.0050                      | 0.1357 ±0.0084                      | -7.213                      | C                     |
| pHKU1601-062 | T62                 | 0.0000                          | 0.0097                          | 0.1501                         | 0.1373                         | 0.0001 ±0.0060                      | 0.2066 ±0.0143                      | -7.633                      | C                     |
| pHKU1601-076 | G76                 | 0.0000                          | 0.0034                          | 0.1640                         | 0.1548                         | 0.0001 ±0.0074                      | 0.0641 ±0.0141                      | -6.464                      | C                     |
| pHKU1601-090 | K90                 | 0.0000                          | 0.0078                          | 0.1501                         | 0.1385                         | 0.0001 ±0.0067                      | 0.1633 ±0.0090                      | -7.398                      | C                     |
| pHKU1601-100 | M100                | 0.0000                          | 0.0033                          | 0.1803                         | 0.1602                         | 0.0001 ±0.0042                      | 0.0599 ±0.0117                      | -6.395                      | C                     |
| pHKU1601-114 | G114                | 0.0458                          | 0.0111                          | 0.2450                         | 0.2109                         | 0.4351 ±0.0167                      | 0.1527 ±0.0114                      | 1.047                       | P                     |
| pHKU1601-126 | A126                | 0.0619                          | 0.0335                          | 0.2573                         | 0.2533                         | 0.5600 ±0.0754                      | 0.3850 ±0.0228                      | 0.375                       | P                     |
| pHKU1601-138 | E138                | 0.0000                          | 0.0420                          | 0.2766                         | 0.2123                         | 0.0001 ±0.0065                      | 0.5769 ±0.0466                      | -8.660                      | C                     |
| pHKU1601-150 | A150                | 0.0000                          | 0.0382                          | 0.1973                         | 0.2299                         | 0.0001 ±0.0088                      | 0.4840 ±0.0130                      | -8.485                      | C                     |
| pHKU1601-163 | Q163                | 0.0000                          | 0.0459                          | 0.2501                         | 0.2128                         | 0.0001 ±0.0081                      | 0.6284 ±0.0406                      | -8.746                      | C                     |
| pHKU1601-172 | I172                | 0.0000                          | 0.0723                          | 0.3168                         | 0.2639                         | 0.0001 ±0.0102                      | 0.7988 ±0.0420                      | -8.986                      | C                     |
| pHKU1601-191 | A191                | 0.0336                          | 0.0064                          | 0.1672                         | 0.1431                         | 0.4677 ±0.0492                      | 0.1303 ±0.0121                      | 1.278                       | P                     |
| pHKU1601-203 | V203                | 0.0063                          | 0.0083                          | 0.2050                         | 0.1690                         | 0.0712 ±0.0070                      | 0.1428 ±0.0124                      | -0.697                      | C                     |
| pHKU1601-220 | V220                | 0.0000                          | 0.0069                          | 0.1865                         | 0.1522                         | 0.0001 ±0.0073                      | 0.1330 ±0.0106                      | -7.193                      | C                     |
| pHKU1601-240 | G240                | 0.0000                          | 0.0045                          | 0.1698                         | 0.1450                         | 0.0001 ±0.0044                      | 0.0896 ±0.0072                      | -6.798                      | C                     |
| pHKU1601-252 | L252                | 0.0000                          | 0.0040                          | 0.1779                         | 0.1578                         | 0.0001 ±0.0057                      | 0.0745 ±0.0091                      | -6.613                      | C                     |
| pHKU1601-266 | G266                | 0.0371                          | 0.0020                          | 0.1804                         | 0.1548                         | 0.4785 ±0.0661                      | 0.0384 ±0.0107                      | 2.523                       | P                     |
| pHKU1601-284 | S284                | 0.0615                          | 0.0069                          | 0.1484                         | 0.1331                         | 0.9647 ±0.1112                      | 0.1513 ±0.0172                      | 1.853                       | P                     |
| pHKU1601-296 | G296                | 0.0000                          | 0.0460                          | 0.2352                         | 0.2158                         | 0.0001 ±0.0049                      | 0.6213 ±0.0374                      | -8.734                      | C                     |
| pHKU1601-313 | K313                | 0.0000                          | 0.0378                          | 0.1612                         | 0.1340                         | 0.0001 ±0.0048                      | 0.8222 ±0.0375                      | -9.015                      | C                     |
| pHKU1601-322 | I322                | 0.0000                          | 0.0449                          | 0.1883                         | 0.1677                         | 0.0001 ±0.0062                      | 0.7800 ±0.0436                      | -8.962                      | C                     |
| pHKU1601-337 | Y337                | 0.0616                          | 0.0085                          | 0.1435                         | 0.1349                         | 1.0000 ±0.1665                      | 0.1829 ±0.0134                      | 1.699                       | P                     |
| pHKU1601-358 | S358                | 0.0637                          | 0.0041                          | 0.1611                         | 0.1348                         | 0.9216 ±0.1059                      | 0.0884 ±0.0069                      | 2.345                       | P                     |
| pHKU1601-379 | A379                | 0.0104                          | 0.0000                          | 0.1646                         | 0.1437                         | 0.1472 ±0.0106                      | 0.0001 ±0.0067                      | 7.294                       | P                     |
| pHKU1601-400 | V400                | 0.0506                          | 0.0019                          | 0.1445                         | 0.1273                         | 0.8150 ±0.0309                      | 0.0435 ±0.0062                      | 2.931                       | P                     |
| pHKU1601-421 | K421                | 0.0302                          | 0.0011                          | 0.1233                         | 0.1285                         | 0.5709 ±0.0587                      | 0.0254 ±0.0072                      | 3.114                       | P                     |
| pHKU1601-442 | A442                | 0.0473                          | 0.0025                          | 0.1374                         | 0.1281                         | 0.8011 ±0.0191                      | 0.0572 ±0.0143                      | 2.639                       | P                     |
| pHKU1601-454 | S454                | 0.0222                          | 0.0000                          | 0.1501                         | 0.1348                         | 0.3441 ±0.0112                      | 0.0001 ±0.0166                      | 8.143                       | P                     |
| pHKU1601-466 | T466                | 0.0000                          | 0.0140                          | 0.1527                         | 0.1381                         | 0.0001 ±0.0090                      | 0.2952 ±0.0288                      | -7.990                      | C                     |
| pHKU1601-479 | M479                | 0.0176                          | 0.0423                          | 0.1872                         | 0.1740                         | 0.2194 ±0.0154                      | 0.7083 ±0.0873                      | -1.172                      | C                     |
| pHKU1601-493 | Y493                | 0.0105                          | 0.0306                          | 0.1415                         | 0.1374                         | 0.1736 ±0.0086                      | 0.6481 ±0.0424                      | -1.317                      | C                     |
| pHKU1601-502 | G502                | 0.0046                          | 0.0377                          | 0.1568                         | 0.1566                         | 0.0687 ±0.0078                      | 0.7006 ±0.0572                      | -2.323                      | C                     |
| pHKU1601-520 | S520                | 0.0078                          | 0.0249                          | 0.1633                         | 0.1512                         | 0.1106 ±0.0141                      | 0.4803 ±0.0209                      | -1.468                      | C                     |
| pHKU1601-532 | A532                | 0.0104                          | 0.0545                          | 0.1757                         | 0.1588                         | 0.1381 ±0.0076                      | 1.0000 ±0.0754                      | -1.980                      | C                     |
| pHKU1601-552 | D552                | 0.0144                          | 0.0336                          | 0.1438                         | 0.1201                         | 0.2338 ±0.0101                      | 0.8142 ±0.0745                      | -1.248                      | C                     |

<sup>a</sup> Position of the last residue of Deh4p followed by reporter.

<sup>b</sup> Average PhoA activity rate was determined by the conversion of *p*-nitrophenylphosphate (PNPP) to *p*-nitrophenol. Formation of *p*-nitrophenol was measured by absorbance at 405 nm as described in Methods.

<sup>c</sup> Average LacZ activity rate was determined by the conversion of *o*-nitrophenylgalactoside (ONPG) to *o*-nitrophenol. Formation of *o*-nitrophenol was measured by absorbance at 420 nm as described in Methods.

<sup>d</sup> and <sup>e</sup> Average cell density used in assaying PhoA or LacZ activity was determined by absorbance at 600 nm as described in Methods.

<sup>f</sup> and <sup>g</sup> PhoA and LacZ activities are presented as mean  $\pm$ S.E. which were obtained by linear regression through at least 20 data points. To normalize PhoA activities, the maximum PhoA activity recorded in the experiment (pHKU1601-337) was transformed to 1 or 100% and PhoA activities of other samples were expressed as a percentage relative to this maximum activity. The same procedure was applied to normalize LacZ activities using the activity from pHKU1601-532 as the maximum. Exception was required when a normalized activity value was zero. In this case an arbitrary small value, 0.0001, was assigned to prevent logging a zero or undefined number in calculating the strength index.

<sup>h</sup> and <sup>i</sup> A positive value for the strength index indicates that the reporter ended in the periplasm (P) and a negative value suggests that the reporter ended in the cytoplasm (C). The strength index was defined as  $\text{Ln}(\text{normalized PhoA activity}/\text{normalized LacZ activity})$ .
